# Supplementary material
Source: PubMed Central journal article supplement (PMC4926971)

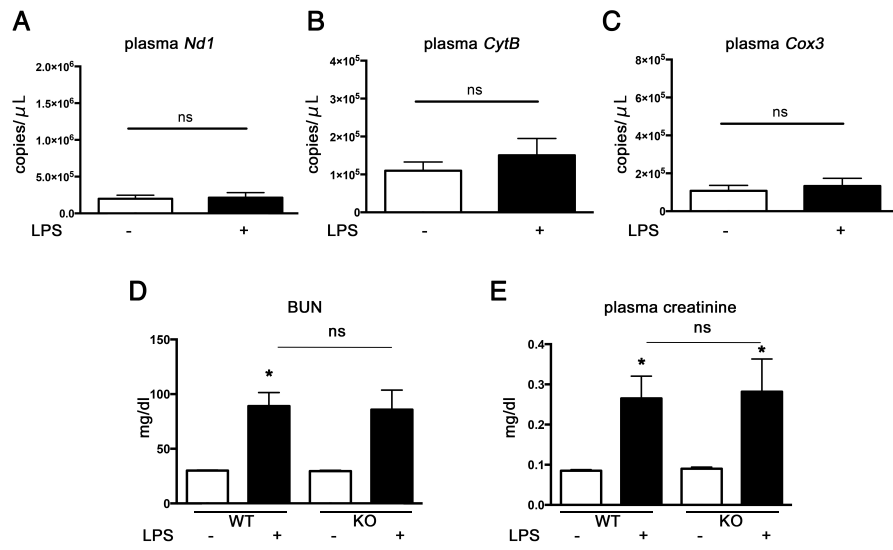

Supplemental Figure 1

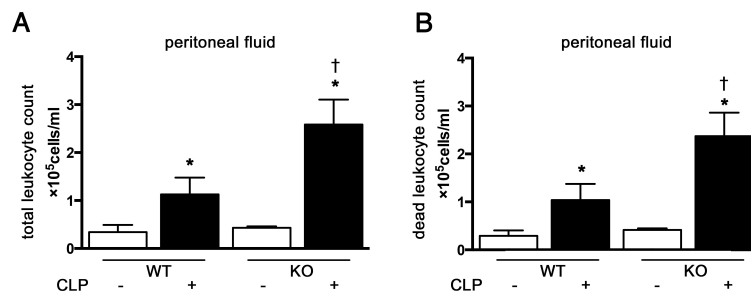

Supplemental Figure 2

Supplement: ASN.2015040376_ASN2015040376SupplementaryData.pdf [file ASN.2015040376_ASN2015040376SupplementaryData.pdf]
